# Supplementary material
Source: publisher site journal article supplement (https://www.dovepress.com/article/554836)
Supplement: Supplementary file 1 [file 554836%20Supplementary%20materials_1.pdf]

## Supplementary materials

### Supplementary Figures

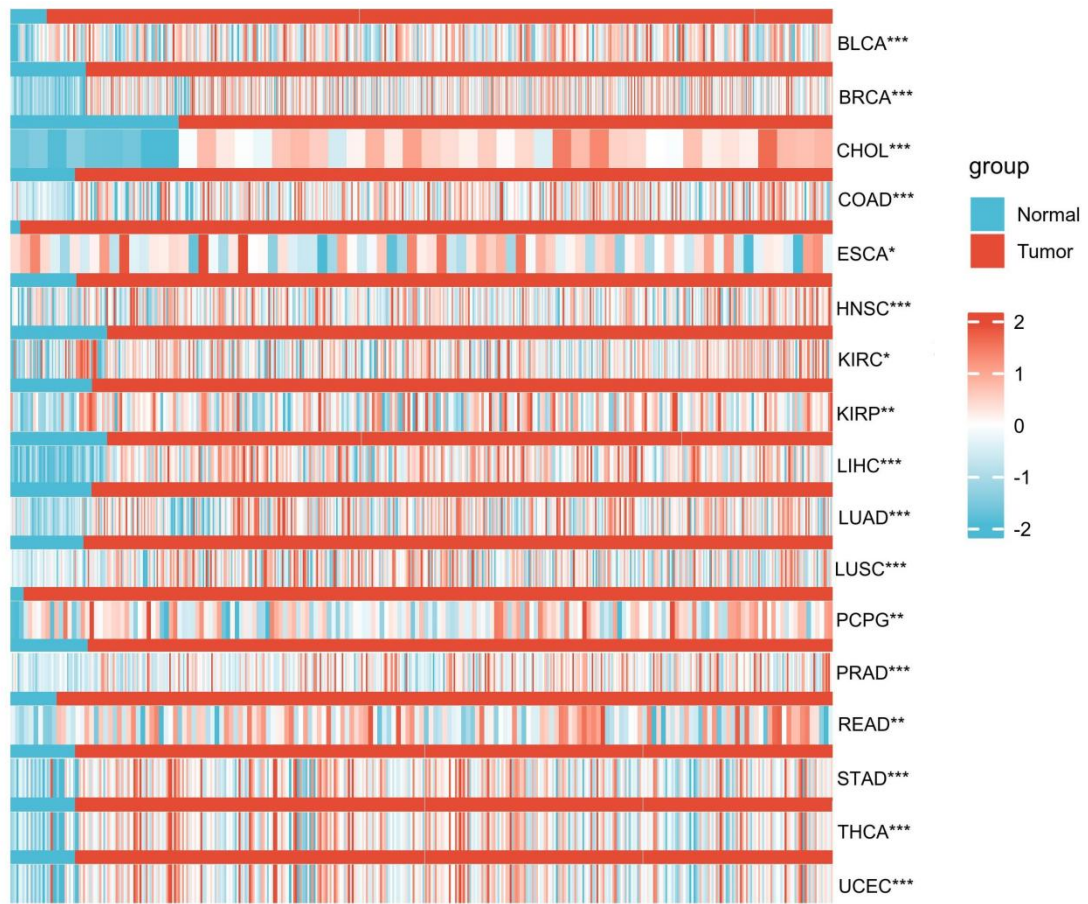

**Fig S1** Expression heatmap of ABHD12 in cancer types exhibiting significant differential expression (tumor vs normal). \*  $p < 0.05$ , \*\*  $p < 0.01$ , \*\*\*  $p < 0.001$ .

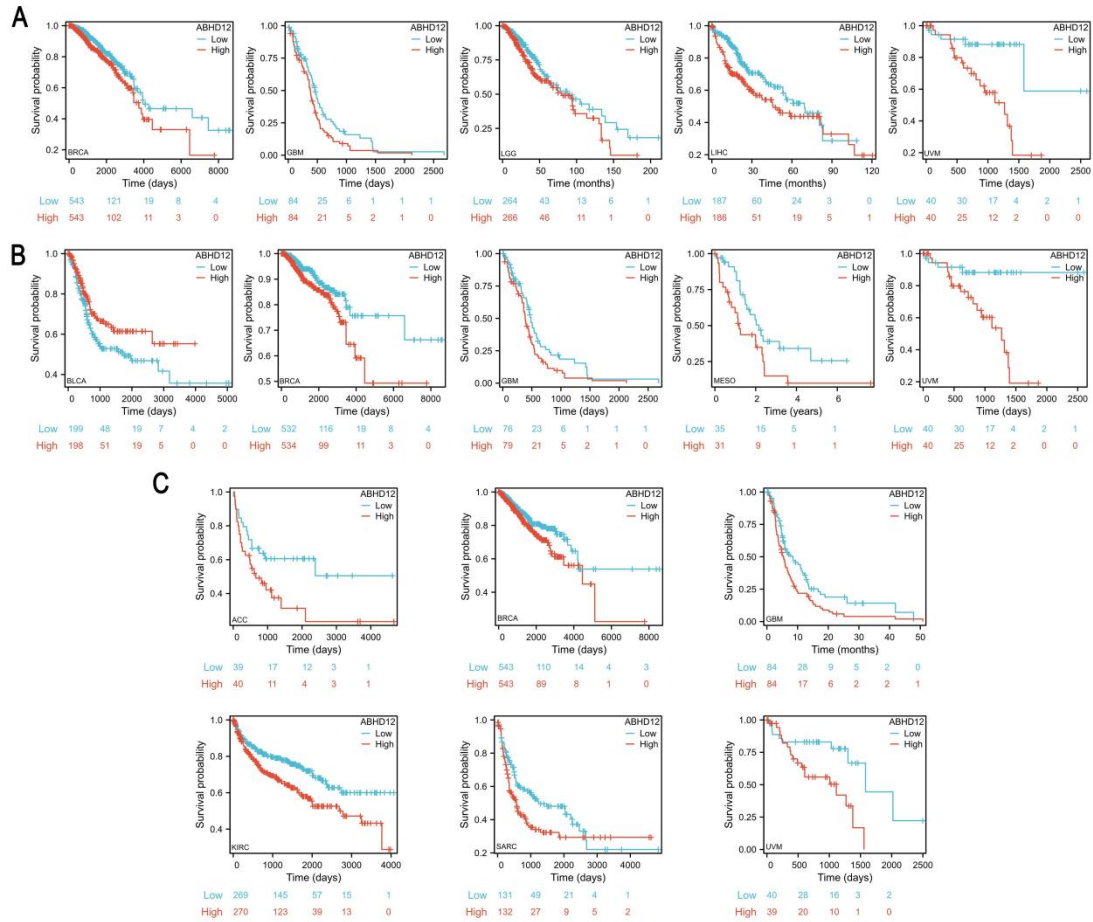

**Fig S2** Kaplan-Meier (KM) Curves Showing the Detailed Association Between ABHD12 Expression and Prognosis in Cancer Patients. **(A)** OS in BRCA (HR=1.48,  $p=0.016$ ), GBM (HR=1.44,  $p=0.036$ ), LGG (HR=1.44,  $p=0.036$ ), LIHC (HR=1.52,  $p=0.019$ ), and UVM (HR=4.22,  $p=0.005$ ). **(B)** DSS in BLCA (HR=0.68,  $p=0.034$ ), BRCA (HR=1.72,  $p=0.014$ ), GBM (HR=1.47,  $p=0.040$ ), MESO (HR=1.91,  $p=0.036$ ), and UVM (HR=4.92,  $p=0.036$ ). **(C)** PFS in ACC (HR=1.191,  $p=0.045$ ), BRCA (HR=1.47,  $p=0.021$ ), GBM (HR=1.54,  $p=0.013$ ), KIRC (HR=1.61,  $p=0.003$ ), SARC (HR=1.46,  $p=0.024$ ) and UVM (HR=3.14,  $p=0.007$ ).

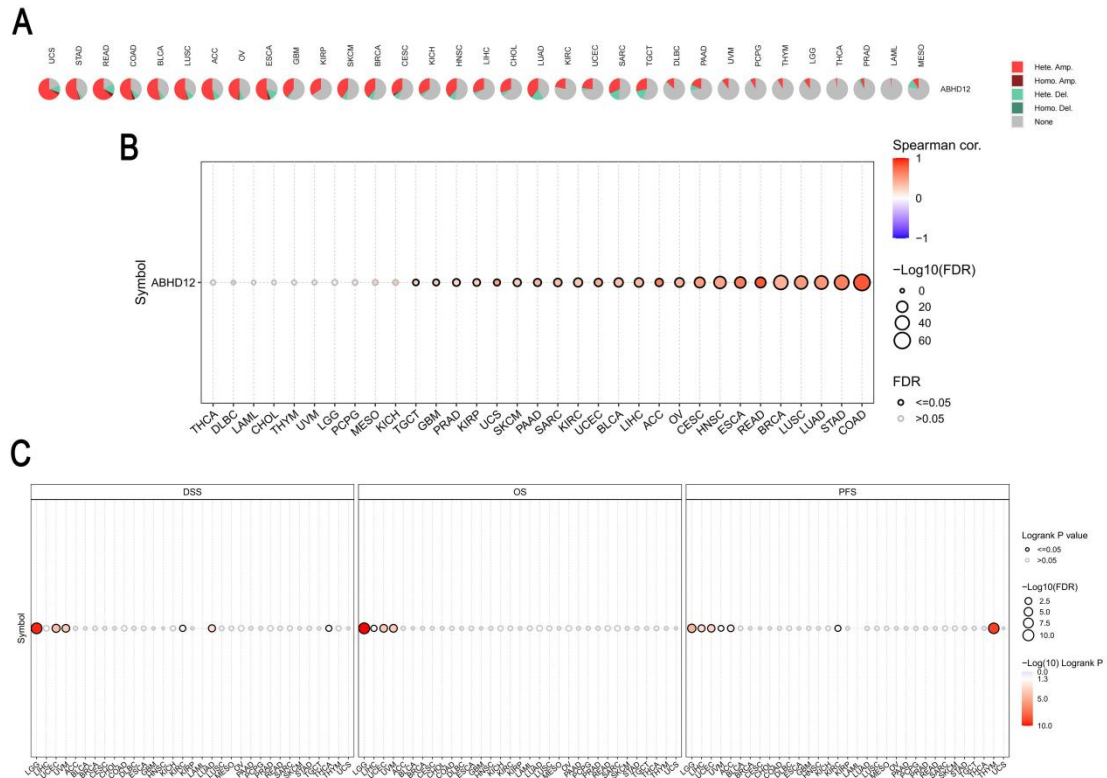

**Fig S3** Mutation analysis of ABHD12. **(A)** Percentage of ABHD12 CNVs in each cancer. **(B)** Correlation between ABHD12 mRNA expression and CNVs. **(C)** Effect of ABHD12 CNVs on prognosis in cancer patients.

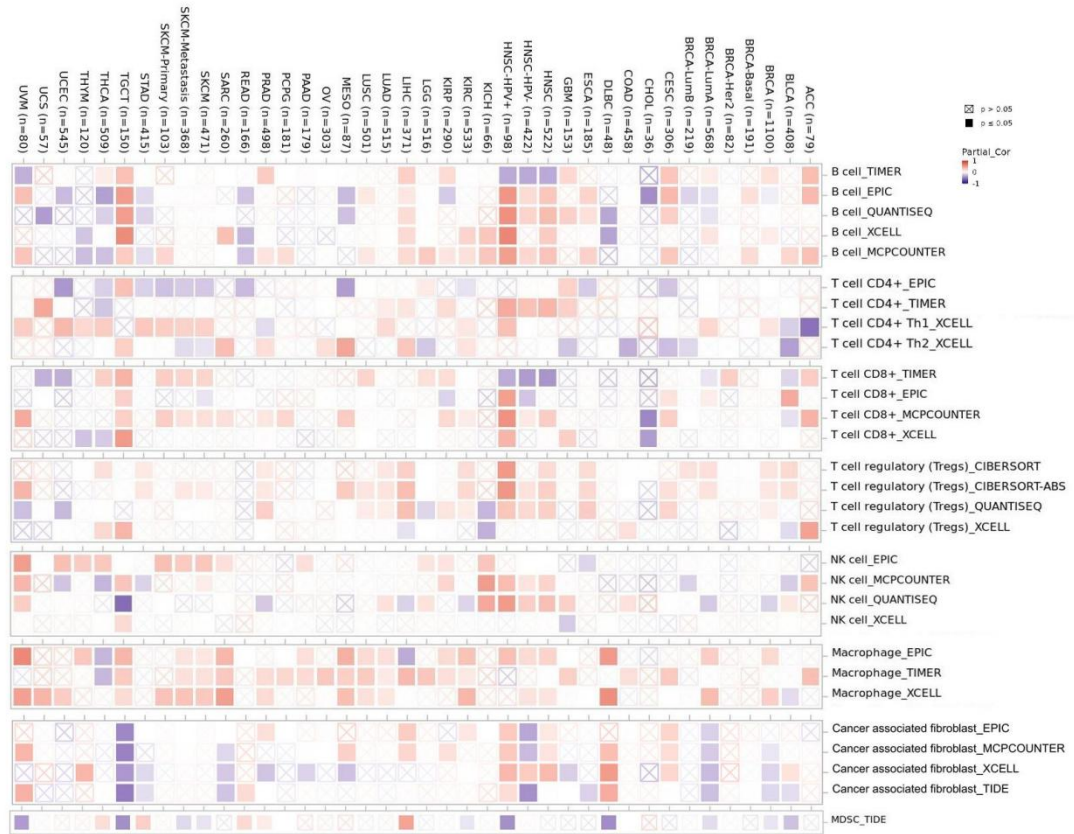

**Fig S4** Correlation analysis of ABHD12 expression with multiple immune cell infiltrates in pan-cancer.

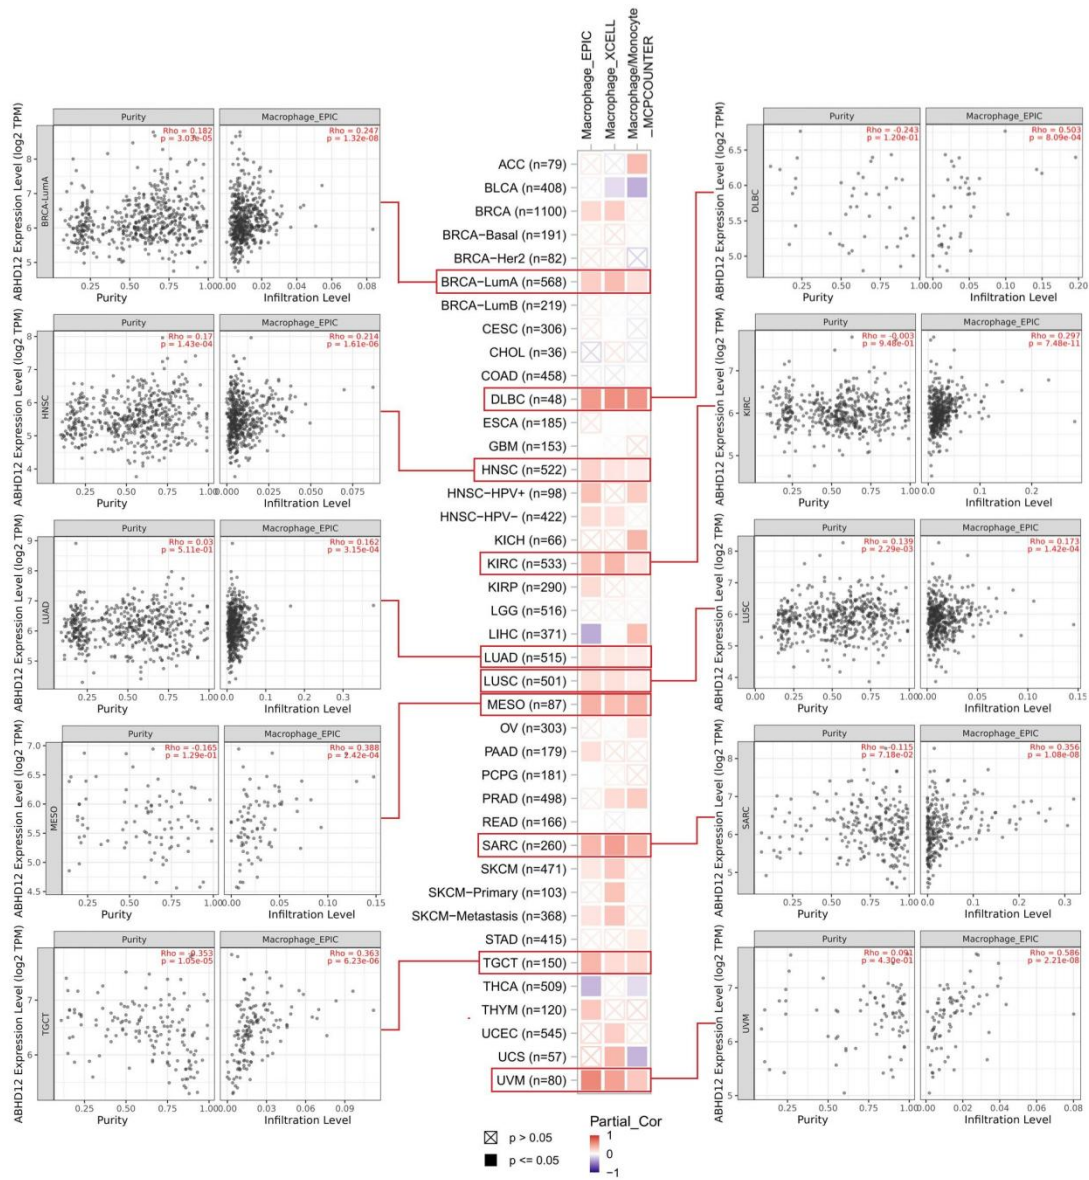

**Fig S5** Correlation analysis of ABHD12 expression with macrophage cell infiltrates in pan-cancer.

**A**

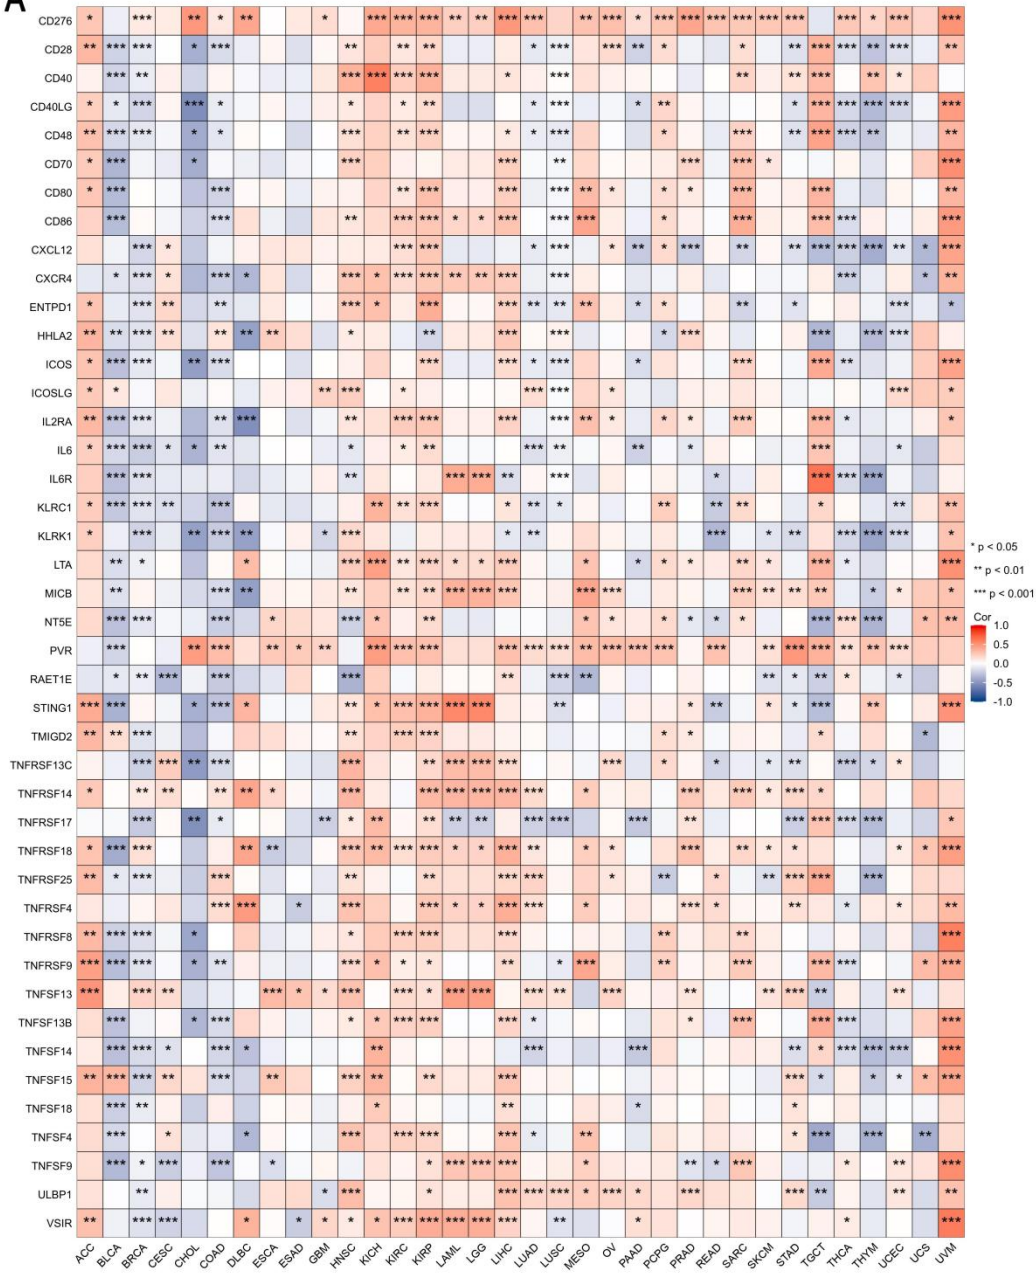

**B**

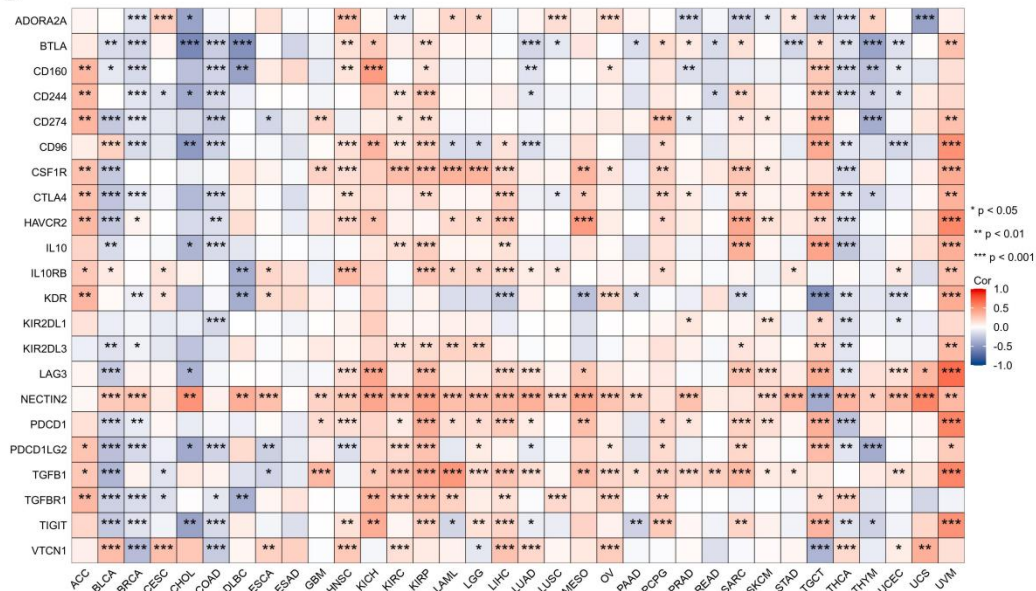

**Fig S6** Co-expression of ABHD12 with **(A)** immune activating genes and **(B)** immune suppressive genes. \*  $p < 0.05$ , \*\*  $p < 0.01$ , \*\*\*  $p < 0.001$ .

**Supplementary Table S1** Number of Samples in Each Cancer Type

| cancer | TGCA   |      |
|--------|--------|------|
|        | group  | n    |
| ACC    | Tumor  | 79   |
| BLCA   | Normal | 19   |
| BLCA   | Tumor  | 412  |
| BRCA   | Normal | 113  |
| BRCA   | Tumor  | 1113 |
| CESC   | Normal | 3    |
| CESC   | Tumor  | 306  |
| CHOL   | Normal | 9    |
| CHOL   | Tumor  | 35   |
| COAD   | Normal | 41   |
| COAD   | Tumor  | 480  |
| DLBC   | Tumor  | 48   |
| ESCA   | Normal | 11   |
| ESCA   | Tumor  | 163  |
| GBM    | Normal | 5    |
| GBM    | Tumor  | 169  |
| HNSC   | Normal | 44   |
| HNSC   | Tumor  | 504  |
| KICH   | Normal | 25   |
| KICH   | Tumor  | 65   |
| KIRC   | Normal | 72   |

|      |        |     |
|------|--------|-----|
| KIRC | Tumor  | 541 |
| KIRP | Normal | 32  |
| KIRP | Tumor  | 291 |
| LAML | Tumor  | 150 |
| LGG  | Tumor  | 532 |
| LIHC | Normal | 50  |
| LIHC | Tumor  | 374 |
| LUAD | Normal | 59  |
| LUAD | Tumor  | 539 |
| LUSC | Normal | 49  |
| LUSC | Tumor  | 502 |
| MESO | Tumor  | 87  |
| OV   | Tumor  | 381 |
| PAAD | Normal | 4   |
| PAAD | Tumor  | 179 |
| PCPG | Normal | 3   |
| PCPG | Tumor  | 184 |
| PRAD | Normal | 52  |
| PRAD | Tumor  | 501 |
| READ | Normal | 10  |
| READ | Tumor  | 167 |
| SARC | Normal | 2   |
| SARC | Tumor  | 263 |
| SKCM | Normal | 1   |
| SKCM | Tumor  | 472 |
| STAD | Normal | 32  |
| STAD | Tumor  | 375 |

|      |        |     |
|------|--------|-----|
| TGCT | Tumor  | 156 |
| THCA | Normal | 59  |
| THCA | Tumor  | 512 |
| THYM | Normal | 2   |
| THYM | Tumor  | 120 |
| UCEC | Normal | 35  |
| UCEC | Tumor  | 554 |
| UCS  | Tumor  | 57  |
| UVM  | Tumor  | 80  |

---

TCGA+GTEx

| cancer | group  | n    |
|--------|--------|------|
| ACC    | Normal | 128  |
| ACC    | Tumor  | 77   |
| BLCA   | Normal | 28   |
| BLCA   | Tumor  | 407  |
| BRCA   | Normal | 292  |
| BRCA   | Tumor  | 1099 |
| CESC   | Normal | 13   |
| CESC   | Tumor  | 306  |
| CHOL   | Normal | 9    |
| CHOL   | Tumor  | 36   |
| COAD   | Normal | 349  |
| COAD   | Tumor  | 290  |
| DLBC   | Normal | 444  |
| DLBC   | Tumor  | 47   |
| ESCA   | Normal | 666  |
| ESCA   | Tumor  | 182  |

|      |        |      |
|------|--------|------|
| GBM  | Normal | 1157 |
| GBM  | Tumor  | 166  |
| HNSC | Normal | 44   |
| HNSC | Tumor  | 520  |
| KICH | Normal | 53   |
| KICH | Tumor  | 66   |
| KIRC | Normal | 100  |
| KIRC | Tumor  | 531  |
| KIRP | Normal | 60   |
| KIRP | Tumor  | 289  |
| LAML | Normal | 70   |
| LAML | Tumor  | 173  |
| LGG  | Normal | 1152 |
| LGG  | Tumor  | 523  |
| LIHC | Normal | 160  |
| LIHC | Tumor  | 371  |
| LUAD | Normal | 347  |
| LUAD | Tumor  | 515  |
| LUSC | Normal | 338  |
| LUSC | Tumor  | 498  |
| MESO | Tumor  | 87   |
| OV   | Normal | 88   |
| OV   | Tumor  | 427  |
| PAAD | Normal | 171  |
| PAAD | Tumor  | 179  |
| PCPG | Normal | 3    |
| PCPG | Tumor  | 182  |

|      |        |     |
|------|--------|-----|
| PRAD | Normal | 152 |
| PRAD | Tumor  | 496 |
| READ | Normal | 318 |
| READ | Tumor  | 93  |
| SARC | Normal | 2   |
| SARC | Tumor  | 262 |
| SKCM | Normal | 813 |
| SKCM | Tumor  | 469 |
| STAD | Normal | 210 |
| STAD | Tumor  | 414 |
| TGCT | Normal | 165 |
| TGCT | Tumor  | 154 |
| THCA | Normal | 338 |
| THCA | Tumor  | 512 |
| THYM | Normal | 446 |
| THYM | Tumor  | 119 |
| UCEC | Normal | 101 |
| UCEC | Tumor  | 181 |
| UCS  | Normal | 78  |
| UCS  | Tumor  | 57  |
| UVM  | Tumor  | 79  |

---

**Supplementary Table S2** Clinical Characteristics of 16 Paired Clinical Samples

| ID   | Age (year) | Molecular subtype | TNM     | ER | PR | HER | Menopausal status | Preoperative Chemotherapy, Radiotherapy, or Hormone Therapy |
|------|------------|-------------------|---------|----|----|-----|-------------------|-------------------------------------------------------------|
| BC01 | 39         | Luminal B         | T2N1M0  | +  | +  | +   | Premenopausal     | No                                                          |
| BC02 | 46         | Luminal A         | T1cN0M0 | +  | +  | -   | Premenopausal     | No                                                          |
| BC03 | 52         | Luminal B         | T2N0M0  | ++ | ++ | +   | Postmenopausal    | No                                                          |
| BC04 | 60         | Triple-negative   | T2N1M0  | -  | -  | -   | Postmenopausal    | No                                                          |
| BC05 | 31         | Luminal B         | T1cN0M0 | +  | +  | -   | Premenopausal     | No                                                          |
| BC06 | 67         | Luminal A         | T1aN0M0 | +  | +  | -   | Postmenopausal    | No                                                          |
| BC07 | 55         | Triple-negative   | T2N0M0  | -  | -  | -   | Postmenopausal    | No                                                          |
| BC08 | 35         | HER2-enriched     | T2N1M0  | -  | -  | +++ | Premenopausal     | No                                                          |
| BC09 | 45         | Luminal A         | T2N1M0  | +  | ++ | -   | Premenopausal     | No                                                          |
| BC10 | 49         | HER2-enriched     | T2N1M0  | +  | -  | +++ | Premenopausal     | No                                                          |
| BC11 | 39         | Triple-negative   | T3N2M0  | -  | -  | -   | Premenopausal     | No                                                          |
| BC12 | 67         | HER2-enriched     | T2N1M0  | -  | -  | +++ | Postmenopausal    | No                                                          |
| BC13 | 51         | HER2-enriched     | T3N2M0  | -  | -  | ++  | Postmenopausal    | No                                                          |
| BC14 | 41         | Triple-negative   | T3N1M0  | -  | -  | -   | Premenopausal     | No                                                          |
| BC15 | 63         | Luminal A         | T1aN0M0 | ++ | ++ | -   | Postmenopausal    | No                                                          |
| BC16 | 58         | Luminal B         | T3N1M0  | ++ | +  | -   | Postmenopausal    | No                                                          |

**Supplementary Table S3** Sequence information of the shRNA used

| Name        | Sequence (5'→3')        |
|-------------|-------------------------|
| sh-ABHD12-1 | CCACAGGATCAAGGTTTGAAT   |
| sh-ABHD12-2 | CCTTGGCTACAGGCACAAATA   |
| sh-ABHD12-3 | CCCTTATATTGGAATCTCCAT   |
| ABHD12-OE-F | TGACATGGAGACCAAGAAAGACC |
| ABHD12-OE-R | ATGCTAGGAAGAGGGGCTCA    |
| ABHD12-F    | TGGCAGAGACCTTATGGTATTGG |
| ABHD12-R    | AGGTCTTTGCCAAATGCTTCTC  |
| GAPDH-F     | GAAGGTGAAGGTCGGAGTCA    |
| GAPDH-R     | GGAAGATGGTGATGGGATTT    |

**Supplementary Table S4A** Univariate and Multivariate Cox Analysis for BRCA

| Characteristics    | Total(N) | Univariate analysis   |         | Multivariate analysis |         |
|--------------------|----------|-----------------------|---------|-----------------------|---------|
|                    |          | Hazard ratio (95% CI) | P value | Hazard ratio (95% CI) | P value |
| Pathologic T stage | 1,083    |                       |         |                       |         |
| T1&T2              | 908      | Reference             |         | Reference             |         |
| T3&T4              | 175      | 1.588 (1.096 - 2.301) | 0.014   | 0.805 (0.451 - 1.438) | 0.464   |
| Pathologic N stage | 1,067    |                       |         |                       |         |
| N0                 | 516      | Reference             |         | Reference             |         |
| N1                 | 358      | 1.947 (1.322 - 2.865) | < 0.001 | 1.370 (0.855 - 2.194) | 0.191   |
| N2                 | 116      | 2.522 (1.484 - 4.287) | < 0.001 | 1.046 (0.430 - 2.548) | 0.920   |
| N3                 | 77       | 4.191 (2.318 - 7.580) | < 0.001 | 1.945 (0.816 - 4.640) | 0.133   |
| Pathologic stage   | 1,062    |                       |         |                       |         |
| Stage I            | 181      | Reference             |         | Reference             |         |
| Stage II           | 619      | 1.703 (0.989 - 2.933) | 0.055   | 1.465 (0.792 - 2.712) | 0.224   |
| Stage III&Stage IV | 262      | 3.566 (2.042 - 6.228) | < 0.001 | 2.930 (1.080 - 7.948) | 0.035   |
| ABHD12             | 1,086    |                       |         |                       |         |
| Low                | 543      | Reference             |         | Reference             |         |
| High               | 543      | 1.484 (1.077 - 2.046) | 0.016   | 1.436 (1.017 - 2.029) | 0.040   |

**Supplementary Table S4B** Univariate and Multivariate Cox Analysis for LGG

| Characteristic<br>s           | Total(N) | Univariate analysis      |         | Multivariate analysis    |         |
|-------------------------------|----------|--------------------------|---------|--------------------------|---------|
|                               |          | Hazard ratio (95%<br>CI) | P value | Hazard ratio (95%<br>CI) | P value |
| Primary<br>therapy<br>outcome | 460      |                          |         |                          |         |
| PR&CR                         | 203      | Reference                |         | Reference                |         |
| PD&SD                         | 257      | 5.052 (2.833 - 9.011)    | < 0.001 | 5.150 (2.887 - 9.185)    | < 0.001 |
| ABHD12                        | 530      |                          |         |                          |         |
| Low                           | 264      | Reference                |         | Reference                |         |
| High                          | 266      | 1.445 (1.025 - 2.036)    | 0.036   | 1.632 (1.135 - 2.346)    | 0.008   |

**Supplementary Table S4C** Univariate and Multivariate Cox Analysis for UVM

| Characteristic<br>s | Total(N) | Univariate analysis    |         | Multivariate analysis  |         |
|---------------------|----------|------------------------|---------|------------------------|---------|
|                     |          | Hazard ratio (95% CI)  | P value | Hazard ratio (95% CI)  | P value |
| Clinical T<br>stage | 78       |                        |         |                        |         |
| T2&T3               | 40       | Reference              |         | Reference              |         |
| T4                  | 38       | 2.416 (0.964 - 6.055)  | 0.060   | 3.180 (1.178 - 8.584)  | 0.022   |
| Age                 | 80       |                        |         |                        |         |
| <= 60               | 40       | Reference              |         | Reference              |         |
| > 60                | 40       | 2.123 (0.914 - 4.933)  | 0.080   | 3.780 (1.489 - 9.598)  | 0.005   |
| ABHD12              | 80       |                        |         |                        |         |
| Low                 | 40       | Reference              |         | Reference              |         |
| High                | 40       | 4.221 (1.561 - 11.413) | 0.005   | 4.229 (1.523 - 11.742) | 0.006   |

**Supplementary Table S5A** Association between ABHD12 mRNA expression levels and drug sensitivity in CTRP

| drug                      | CTRP        |             |
|---------------------------|-------------|-------------|
|                           | cor         | fdr         |
| alvocidib                 | 0.35287075  | 8.55799E-11 |
| BI-2536                   | 0.371975381 | 4.36306E-26 |
| BRD-K66453893             | 0.361784299 | 1.27002E-23 |
| CD-437                    | 0.362057354 | 1.29523E-23 |
| clofarabine               | 0.386985518 | 8.69921E-28 |
| cytarabine hydrochloride  | 0.398527232 | 2.44245E-29 |
| docetaxel                 | 0.365586061 | 3.35199E-11 |
| doxorubicin               | 0.357483762 | 5.45353E-24 |
| etoposide                 | 0.384242156 | 5.60276E-27 |
| gemcitabine               | 0.374019581 | 2.60383E-23 |
| GSK461364                 | 0.387577743 | 3.90483E-27 |
| indisulam                 | 0.36875148  | 2.56862E-23 |
| isoevodiamine             | 0.371766453 | 3.6437E-25  |
| KX2-391                   | 0.370724609 | 1.0189E-24  |
| leptomycin B              | 0.343156262 | 4.12593E-22 |
| LY-2183240                | 0.370809421 | 3.06162E-25 |
| mitomycin                 | 0.385113258 | 1.27327E-26 |
| nakiterpiosin             | 0.358237073 | 4.22384E-23 |
| omacetaxine mepesuccinate | 0.355112009 | 1.2606E-16  |
| parbendazole              | 0.377018091 | 1.12534E-26 |
| PF-3758309                | 0.368887365 | 2.93215E-12 |
| rigosertib                | 0.374407443 | 1.64833E-24 |
| SB-225002                 | 0.362331516 | 1.46439E-24 |

|                     |             |             |
|---------------------|-------------|-------------|
| SB-743921           | 0.350173512 | 4.97712E-23 |
| teniposide          | 0.422540614 | 2.9107E-17  |
| tivantinib          | 0.387124633 | 1.83167E-13 |
| topotecan           | 0.367558297 | 3.92269E-25 |
| triazolothiadiazine | 0.390326124 | 1.06521E-28 |
| vincristine         | 0.369585093 | 3.37753E-26 |
| YK 4-279            | 0.364364198 | 2.38919E-24 |

**Supplementary Table S5B** Association between ABHD12 mRNA expression levels and drug sensitivity in GDSC

| drug               | GDSC        |             |
|--------------------|-------------|-------------|
|                    | cor         | fdr         |
| 5-Fluorouracil     | 0.27120755  | 0           |
| AR-42              | 0.255199803 | 6.81171E-14 |
| AT-7519            | 0.285259279 | 0           |
| AZD8055            | 0.262890276 | 4.69152E-13 |
| BX-912             | 0.305812356 | 0           |
| CAY10603           | 0.26029922  | 1.99245E-14 |
| CP466722           | 0.304097747 | 0           |
| CX-5461            | 0.28654432  | 0           |
| FK866              | 0.33329482  | 0           |
| GSK1070916         | 0.275702753 | 0           |
| I-BET-762          | 0.289619195 | 0           |
| Ispinesib Mesylate | 0.334916082 | 0           |
| JW-7-24-1          | 0.264192523 | 7.04545E-15 |
| KIN001-102         | 0.275140373 | 0           |
| Methotrexate       | 0.304580309 | 0           |

|               |             |             |
|---------------|-------------|-------------|
| NG-25         | 0.268022337 | 0           |
| NPK76-II-72-1 | 0.279578725 | 0           |
| PHA-793887    | 0.325534063 | 0           |
| PI-103        | 0.274554903 | 0           |
| PIK-93        | 0.297599465 | 0           |
| SNX-2112      | 0.258926242 | 3.07688E-14 |
| TG101348      | 0.250502981 | 1.39679E-13 |
| THZ-2-102-1   | 0.26762615  | 7.29334E-15 |
| TL-1-85       | 0.251168682 | 1.46694E-13 |
| TPCA-1        | 0.309055388 | 0           |
| Tubastatin A  | 0.303264559 | 0           |
| Vorinostat    | 0.292447539 | 0           |
| WZ3105        | 0.254703349 | 5.33286E-14 |
| XMD13-2       | 0.280820476 | 0           |
| ZSTK474       | 0.257187594 | 5.13482E-14 |

**Supplementary Table S6** List of the top genes associated with ABHD12

| Gene Symbol | Gene ID         | PCC   |
|-------------|-----------------|-------|
| HSCB        | ENSP00000216027 | 0.292 |
| B3GAT2      | ENSP00000230053 | 0.163 |
| CANX        | ENSP00000247461 | 0.19  |
| SRSF1       | ENSP00000258962 | 0.292 |
| GYS2        | ENSP00000261195 | 0.282 |
| ALG1        | ENSP00000262374 | 0.282 |
| DPP9        | ENSP00000262960 | 0.376 |
| PLEKHA4     | ENSP00000263265 | 0.292 |
| LMBR1L      | ENSP00000267102 | 0.292 |

|          |                 |       |
|----------|-----------------|-------|
| SLC39A4  | ENSP00000301305 | 0.224 |
| GYS1     | ENSP00000317904 | 0.282 |
| DNAJB12  | ENSP00000345575 | 0.165 |
| VAPA     | ENSP00000345656 | 0.224 |
| UGT1A9   | ENSP00000346768 | 0.165 |
| PEX19    | ENSP00000357051 | 0.225 |
| IRAK1    | ENSP00000358997 | 0.155 |
| PLAC9    | ENSP00000361337 | 0.163 |
| HLA-DRB5 | ENSP00000364114 | 0.186 |
| B3GALT4  | ENSP00000390784 | 0.161 |
| SLC39A12 | ENSP00000366586 | 0.196 |
| ALG1L    | ENSP00000482705 | 0.282 |
| PIGA     | ENSP00000369820 | 0.282 |
| ALG1L2   | ENSP00000479850 | 0.282 |
| ALG11    | ENSP00000430236 | 0.282 |
| PIGW     | ENSP00000482202 | 0.282 |
| CPVL     | ENSP00000387164 | 0.252 |
| ALG2     | ENSP00000417764 | 0.282 |

**Supplementary Table S7** GO terms and KEGG pathways enriched in the analysis

| ONTOLOGY | ID         | Description                                          | GeneRatio | p.adjust    |
|----------|------------|------------------------------------------------------|-----------|-------------|
| BP       | GO:0097502 | mannosylation                                        | 5/104     | 0.001632753 |
| BP       | GO:0006486 | protein glycosylation                                | 9/104     | 0.001632753 |
| BP       | GO:0043413 | macromolecule glycosylation                          | 9/104     | 0.001632753 |
| BP       | GO:0070085 | glycosylation                                        | 9/104     | 0.00213848  |
| BP       | GO:0006488 | dolichol-linked oligosaccharide biosynthetic process | 3/104     | 0.023417714 |
| CC       | GO:0033176 | proton-transporting V-type ATPase complex            | 4/112     | 0.003111657 |
| CC       | GO:0033180 | proton-transporting V-type ATPase, V1 domain         | 3/112     | 0.003111657 |

|      |            |                                                        |        |             |
|------|------------|--------------------------------------------------------|--------|-------------|
| CC   | GO:0005765 | lysosomal membrane                                     | 10/112 | 0.004057763 |
| CC   | GO:0030134 | COPII-coated ER to Golgi transport vesicle             | 4/112  | 0.034024005 |
| CC   | GO:0000421 | autophagosome membrane                                 | 3/112  | 0.047796755 |
| MF   | GO:0016758 | hexosyltransferase activity                            | 12/111 | 6.34983E-07 |
| MF   | GO:0016757 | glycosyltransferase activity                           | 13/111 | 1.13136E-06 |
| MF   | GO:0000030 | mannosyltransferase activity                           | 5/111  | 2.23943E-05 |
| MF   | GO:0008194 | UDP-glycosyltransferase activity                       | 7/111  | 0.0015872   |
| KEGG | hsa00510   | N-Glycan biosynthesis                                  | 4/47   | 0.025609498 |
| KEGG | hsa00563   | Glycosylphosphatidylinositol (GPI)-anchor biosynthesis | 3/47   | 0.028651017 |
| KEGG | hsa04152   | AMPK signaling pathway                                 | 5/47   | 0.028651017 |
| KEGG | hsa00513   | Various types of N-glycan biosynthesis                 | 3/47   | 0.038716535 |
| KEGG | hsa04145   | Phagosome                                              | 5/47   | 0.038716535 |

---
